# Supplementary material for: Interplay between k-core and community structure in complex networks
Source: PubMed Central journal article supplement (PMC7477593; doi:10.1038/s41598-020-71426-8), 2020-09-07
Supplement: 41598_2020_71426_MOESM1_ESM.pdf [file 41598_2020_71426_MOESM1_ESM.pdf]

# Supplementary Materials for the manuscript entitled: Interplay between $k$ -core and community structure in complex networks

Irene Malvestio, Alessio Cardillo, & Naoki Masuda

## 1 Comparison between the original and shuffled networks

In this section, we provide a detailed characterisation of the  $k$ -core decomposition of the shuffled networks for all the empirical networks. Supplementary Figure S1 shows the survival function of the probability distribution of the  $k$ -shell index,  $P_{\geq}(k_s)$ , of the original networks and their shuffled counterparts (`deg`, `commA`, and `commB`). The figure indicates that `commA` and `commB` produce  $k$ -shell distributions that are more similar to the original ones, compared to `deg`, in particular when `commA` or `commB` is combined with `SBM`. This result also holds true for the Greece and Spain networks of Cookpad where, contrarily to the other data sets, the `deg` networks have a degeneracy,  $D$ , higher than the original networks.

In Supplementary Table S1, we report the values of the four indicators used for comparing the  $k$ -core decomposition between the original and shuffled networks. In particular, we report the average value and standard deviation of the relative difference  $\Delta X = |X(G) - X(G')|/X(G)$  where  $X$  is either the average  $k$ -shell index,  $\langle k_s \rangle$ , or  $D$ . In the same table, we also report the values of the Jaccard score,  $J$ , and Kendall's tau,  $\tau_K$ , calculated for the set of nodes belonging to the innermost  $k$ -shells (see the main text for the details of the methods). We notice that, in general, `commB-SBM` yields the smallest values of  $\Delta \langle k_s \rangle$  and  $\Delta D$  and the largest values of  $J$  and  $\tau_K$ ; confirming its good performances in reconstructing the  $k$ -core decomposition of the original network. Supplementary Figure S2 provides an overview of the performances of each shuffling method. Figure 2 in the main text is a projection of the information contained in Supplementary Fig. S2.

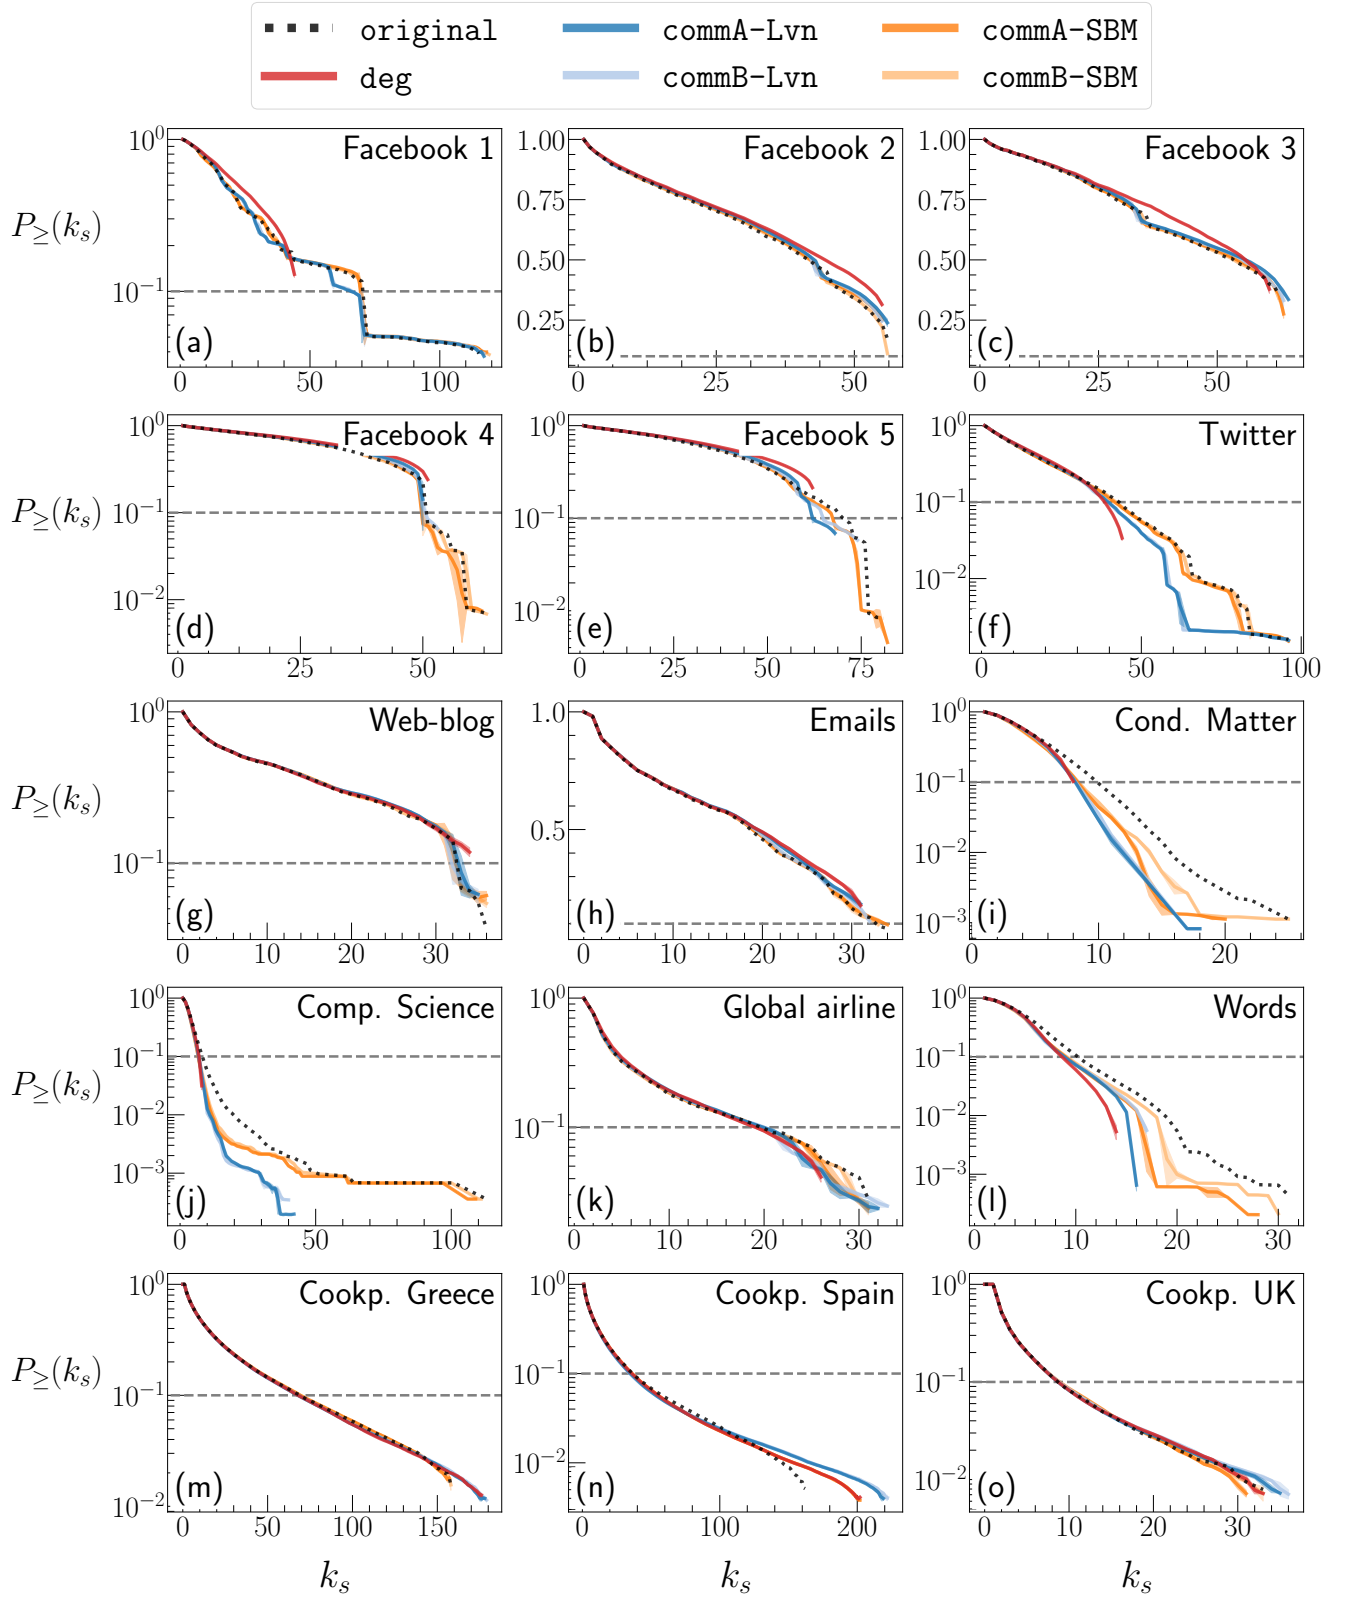

Supplementary Figure S1: Survival function of the probability distribution of the  $k$ -shell index,  $P_{\ge}(k_s)$ , as a function of  $k_s$  for the empirical network (dotted lines) and shuffled networks (solid lines). Each panel corresponds to a data set. The horizontal dashed lines represent  $P_{\ge}(k_s) = 0.1$ . The results shown are averages over 10 different runs of each shuffling method, and the shaded areas (when visible) represent the standard deviations.

| Data set         | Indicator                   | deg           | commA-Lvn     | commB-Lvn     | commA-SBM     | commB-SBM     |
|------------------|-----------------------------|---------------|---------------|---------------|---------------|---------------|
| Facebook 1       | $\Delta\langle k_s \rangle$ | 0.132 ± 0.002 | 0.011 ± 0.001 | 0.007 ± 0.003 | 0.004 ± 0.002 | 0.002 ± 0.001 |
|                  | $\Delta D$                  | 0.622 ± 0.004 | 0.004 ± 0.006 | 0.009 ± 0.007 | 0.014 ± 0.006 | 0.017 ± 0.007 |
|                  | $J$                         | 0.340 ± 0.025 | 0.512 ± 0.009 | 0.515 ± 0.004 | 0.722 ± 0.212 | 0.787 ± 0.207 |
|                  | $\tau_K$                    | 0.884 ± 0.005 | 0.971 ± 0.014 | 0.974 ± 0.012 | 0.963 ± 0.015 | 0.980 ± 0.018 |
| Facebook 2       | $\Delta\langle k_s \rangle$ | 0.043 ± 0.000 | 0.020 ± 0.003 | 0.011 ± 0.001 | 0.006 ± 0.000 | 0.002 ± 0.001 |
|                  | $\Delta D$                  | 0.018 ± 0.000 | 0.007 ± 0.009 | 0.018 ± 0.000 | 0.018 ± 0.000 | 0.012 ± 0.008 |
|                  | $J$                         | 0.515 ± 0.008 | 0.664 ± 0.038 | 0.695 ± 0.014 | 0.685 ± 0.021 | 0.737 ± 0.064 |
|                  | $\tau_K$                    | 1.000 ± 0.000 | 1.000 ± 0.000 | 1.000 ± 0.000 | 1.000 ± 0.000 | 1.000 ± 0.000 |
| Facebook 3       | $\Delta\langle k_s \rangle$ | 0.019 ± 0.004 | 0.025 ± 0.002 | 0.017 ± 0.003 | 0.007 ± 0.003 | 0.002 ± 0.001 |
|                  | $\Delta D$                  | 0.035 ± 0.006 | 0.017 ± 0.005 | 0.011 ± 0.007 | 0.006 ± 0.008 | 0.000 ± 0.000 |
|                  | $J$                         | 0.788 ± 0.009 | 0.853 ± 0.009 | 0.856 ± 0.027 | 0.840 ± 0.066 | 0.918 ± 0.017 |
|                  | $\tau_K$                    | 1.000 ± 0.000 | 1.000 ± 0.000 | 1.000 ± 0.000 | 1.000 ± 0.000 | 1.000 ± 0.000 |
| Facebook 4       | $\Delta\langle k_s \rangle$ | 0.044 ± 0.003 | 0.012 ± 0.002 | 0.005 ± 0.002 | 0.003 ± 0.001 | 0.002 ± 0.001 |
|                  | $\Delta D$                  | 0.203 ± 0.006 | 0.206 ± 0.000 | 0.165 ± 0.008 | 0.027 ± 0.010 | 0.005 ± 0.007 |
|                  | $J$                         | 0.247 ± 0.017 | 0.531 ± 0.186 | 0.744 ± 0.015 | 0.837 ± 0.005 | 0.951 ± 0.016 |
|                  | $\tau_K$                    | 0.818 ± 0.011 | 0.584 ± 0.154 | 0.535 ± 0.027 | 0.865 ± 0.008 | 0.959 ± 0.014 |
| Facebook 5       | $\Delta\langle k_s \rangle$ | 0.030 ± 0.002 | 0.002 ± 0.001 | 0.002 ± 0.001 | 0.001 ± 0.001 | —             |
|                  | $\Delta D$                  | 0.237 ± 0.005 | 0.169 ± 0.006 | 0.098 ± 0.004 | 0.017 ± 0.006 | —             |
|                  | $J$                         | 0.406 ± 0.023 | 0.619 ± 0.004 | 0.664 ± 0.004 | 0.712 ± 0.015 | —             |
|                  | $\tau_K$                    | 0.724 ± 0.016 | 0.699 ± 0.016 | 0.721 ± 0.011 | 0.881 ± 0.014 | —             |
| Twitter          | $\Delta\langle k_s \rangle$ | 0.055 ± 0.000 | 0.028 ± 0.000 | 0.030 ± 0.000 | 0.014 ± 0.000 | 0.008 ± 0.000 |
|                  | $\Delta D$                  | 0.542 ± 0.000 | 0.005 ± 0.005 | 0.007 ± 0.005 | 0.011 ± 0.007 | 0.007 ± 0.005 |
|                  | $J$                         | 0.540 ± 0.001 | 0.641 ± 0.008 | 0.637 ± 0.005 | 0.834 ± 0.003 | 0.881 ± 0.011 |
|                  | $\tau_K$                    | 0.580 ± 0.004 | 0.749 ± 0.002 | 0.755 ± 0.002 | 0.884 ± 0.002 | 0.941 ± 0.002 |
| Web-blog         | $\Delta\langle k_s \rangle$ | 0.005 ± 0.002 | 0.004 ± 0.003 | 0.004 ± 0.002 | 0.007 ± 0.004 | 0.003 ± 0.002 |
|                  | $\Delta D$                  | 0.069 ± 0.014 | 0.056 ± 0.012 | 0.042 ± 0.014 | 0.022 ± 0.011 | 0.008 ± 0.013 |
|                  | $J$                         | 0.416 ± 0.009 | 0.780 ± 0.021 | 0.775 ± 0.022 | 0.853 ± 0.021 | 0.920 ± 0.017 |
|                  | $\tau_K$                    | 0.794 ± 0.018 | 0.619 ± 0.061 | 0.646 ± 0.038 | 0.651 ± 0.068 | 0.664 ± 0.070 |
| Emails           | $\Delta\langle k_s \rangle$ | 0.011 ± 0.006 | 0.005 ± 0.002 | 0.003 ± 0.001 | 0.005 ± 0.003 | 0.002 ± 0.001 |
|                  | $\Delta D$                  | 0.103 ± 0.015 | 0.103 ± 0.015 | 0.065 ± 0.012 | 0.024 ± 0.012 | 0.029 ± 0.000 |
|                  | $J$                         | 0.422 ± 0.044 | 0.454 ± 0.035 | 0.671 ± 0.069 | 0.701 ± 0.027 | 0.845 ± 0.057 |
|                  | $\tau_K$                    | 0.908 ± 0.008 | 0.895 ± 0.008 | 0.864 ± 0.023 | 0.855 ± 0.011 | 0.842 ± 0.048 |
| Cond. Matter     | $\Delta\langle k_s \rangle$ | 0.123 ± 0.001 | 0.111 ± 0.001 | 0.113 ± 0.001 | 0.117 ± 0.001 | 0.113 ± 0.001 |
|                  | $\Delta D$                  | 0.680 ± 0.000 | 0.284 ± 0.012 | 0.296 ± 0.020 | 0.244 ± 0.022 | 0.016 ± 0.020 |
|                  | $J$                         | 0.395 ± 0.006 | 0.423 ± 0.013 | 0.481 ± 0.008 | 0.548 ± 0.013 | 0.615 ± 0.005 |
|                  | $\tau_K$                    | 0.521 ± 0.018 | 0.415 ± 0.025 | 0.479 ± 0.016 | 0.623 ± 0.013 | 0.685 ± 0.008 |
| Comp. Science    | $\Delta\langle k_s \rangle$ | 0.171 ± 0.004 | 0.153 ± 0.000 | 0.159 ± 0.000 | 0.146 ± 0.000 | 0.144 ± 0.000 |
|                  | $\Delta D$                  | 0.933 ± 0.004 | 0.641 ± 0.006 | 0.651 ± 0.004 | 0.047 ± 0.007 | 0.023 ± 0.004 |
|                  | $J$                         | 0.374 ± 0.069 | 0.488 ± 0.002 | 0.456 ± 0.002 | 0.504 ± 0.003 | 0.493 ± 0.002 |
|                  | $\tau_K$                    | 0.371 ± 0.358 | 0.688 ± 0.003 | 0.673 ± 0.002 | 0.686 ± 0.002 | 0.711 ± 0.002 |
| Global airline   | $\Delta\langle k_s \rangle$ | 0.023 ± 0.001 | 0.004 ± 0.003 | 0.008 ± 0.003 | 0.009 ± 0.003 | 0.010 ± 0.002 |
|                  | $\Delta D$                  | 0.161 ± 0.000 | 0.013 ± 0.016 | 0.035 ± 0.017 | 0.010 ± 0.015 | 0.003 ± 0.010 |
|                  | $J$                         | 0.766 ± 0.011 | 0.826 ± 0.010 | 0.824 ± 0.039 | 0.852 ± 0.016 | 0.933 ± 0.008 |
|                  | $\tau_K$                    | 0.661 ± 0.016 | 0.831 ± 0.006 | 0.846 ± 0.014 | 0.872 ± 0.020 | 0.932 ± 0.006 |
| Words            | $\Delta\langle k_s \rangle$ | 0.118 ± 0.000 | 0.105 ± 0.000 | 0.108 ± 0.000 | 0.107 ± 0.000 | 0.102 ± 0.000 |
|                  | $\Delta D$                  | 0.552 ± 0.010 | 0.484 ± 0.000 | 0.458 ± 0.013 | 0.097 ± 0.000 | 0.032 ± 0.000 |
|                  | $J$                         | 0.473 ± 0.003 | 0.575 ± 0.001 | 0.575 ± 0.002 | 0.592 ± 0.001 | 0.675 ± 0.002 |
|                  | $\tau_K$                    | 0.668 ± 0.003 | 0.740 ± 0.001 | 0.758 ± 0.003 | 0.794 ± 0.003 | 0.815 ± 0.001 |
| Cookpad – Greece | $\Delta\langle k_s \rangle$ | 0.002 ± 0.000 | 0.001 ± 0.000 | 0.002 ± 0.000 | 0.002 ± 0.001 | 0.000 ± 0.000 |
|                  | $\Delta D$                  | 0.110 ± 0.003 | 0.113 ± 0.007 | 0.129 ± 0.003 | 0.016 ± 0.006 | 0.004 ± 0.003 |
|                  | $J$                         | 0.846 ± 0.003 | 0.865 ± 0.003 | 0.892 ± 0.004 | 0.941 ± 0.002 | 0.964 ± 0.002 |
|                  | $\tau_K$                    | 0.850 ± 0.001 | 0.871 ± 0.001 | 0.894 ± 0.001 | 0.943 ± 0.002 | 0.968 ± 0.004 |
| Cookpad – Spain  | $\Delta\langle k_s \rangle$ | 0.002 ± 0.000 | 0.005 ± 0.000 | 0.005 ± 0.000 | 0.002 ± 0.000 | 0.002 ± 0.000 |
|                  | $\Delta D$                  | 0.240 ± 0.006 | 0.346 ± 0.006 | 0.362 ± 0.005 | 0.238 ± 0.005 | 0.234 ± 0.006 |
|                  | $J$                         | 0.762 ± 0.006 | 0.872 ± 0.004 | 0.903 ± 0.003 | 0.760 ± 0.005 | 0.762 ± 0.006 |
|                  | $\tau_K$                    | 0.837 ± 0.001 | 0.890 ± 0.001 | 0.907 ± 0.000 | 0.837 ± 0.001 | 0.837 ± 0.001 |
| Cookpad – UK     | $\Delta\langle k_s \rangle$ | 0.001 ± 0.001 | 0.005 ± 0.001 | 0.012 ± 0.001 | 0.001 ± 0.001 | 0.001 ± 0.000 |
|                  | $\Delta D$                  | 0.030 ± 0.014 | 0.027 ± 0.016 | 0.085 ± 0.012 | 0.076 ± 0.015 | 0.012 ± 0.015 |
|                  | $J$                         | 0.754 ± 0.010 | 0.781 ± 0.007 | 0.827 ± 0.005 | 0.835 ± 0.003 | 0.886 ± 0.006 |
|                  | $\tau_K$                    | 0.826 ± 0.003 | 0.852 ± 0.003 | 0.893 ± 0.002 | 0.886 ± 0.002 | 0.922 ± 0.002 |

Supplementary Table S1: Average and standard deviation of the four indicators characterising the  $k$ -core decomposition. In the cells with missing values, the shuffling method did not converge.

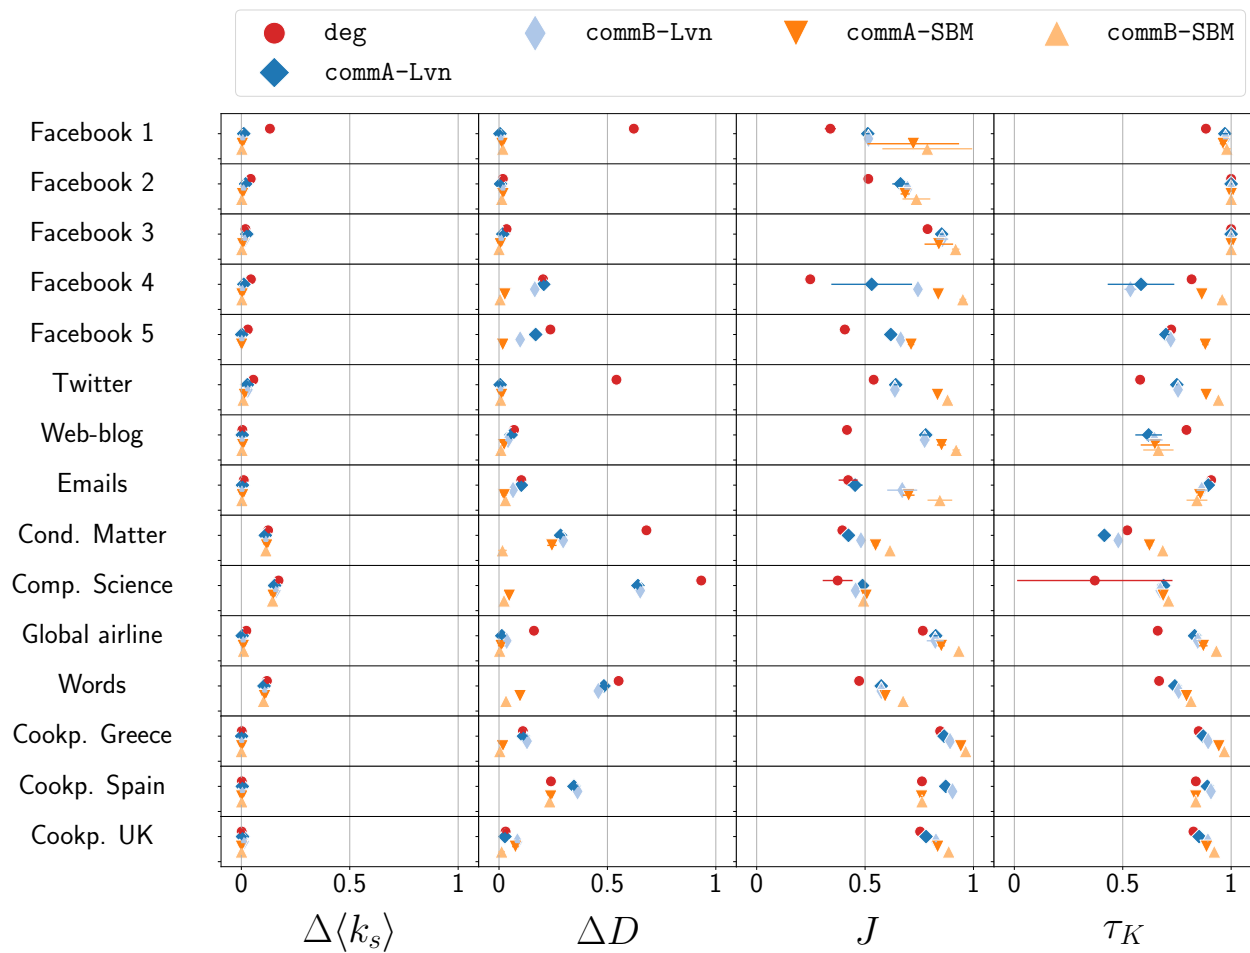

Supplementary Figure S2: Graphical summary of the values reported in Supplementary Table S1. For each pair of an empirical network and indicator, we show the value of the indicator for each shuffling method. The error bars represent the standard deviation.

## 2 Effects of changing the resolution of the Louvain method

A pitfall of the Louvain method is its propensity to merge small communities due to the existence of a lower bound in the size of the communities (*i.e.*, the modularity’s resolution limit) [1, 2]. However, communities of empirical networks may not have a typical size, and small communities coexist with large ones in general. A method for mitigating the resolution limit is to introduce a resolution parameter  $r \in (0, 1]$  into the Louvain algorithm [3]. By tuning  $r$ , it is possible to vary the resolution scale of the detected communities, spanning from large (*i.e.*,  $r \sim 1$ ) to small (*i.e.*,  $r \sim 0$ ) communities. We denote the Louvain method using a different resolution  $r$  by  $\text{Lvnr}$ .

Figure 2 in the main text shows that  $\text{commB}$  combined with the communities found by the SBM reproduces the tail of  $P_{\geq}(k_s)$  of the empirical networks most accurately. Table 1 indicates that SBM tends to find more communities than  $\text{Lvnr}$ , although there are exceptions. To understand whether the different number of communities found by SBM and  $\text{Lvnr}$  is the reason behind their different performances, we extracted the communities using  $\text{Lvnr}$  with  $r \in \{0.1, 0.3, 0.5\}$ . For the sake of brevity, we only discuss the results for  $r = 0.3$  in the following text. However, we have verified that the results for the other values of  $r$  are similar.

In Supplementary Table S2 we show, for all the data sets considered, the number of communities,  $N_c$ , and the modularity,  $Q$ , corresponding to the community structure found using  $\text{Lvnr}$ , SBM, and  $\text{Lvnr}$  with  $r = 0.3$ . With  $\text{Lvnr}$ , the number of communities is similar or even larger than that obtained with SBM. Supplementary Figures S3 and S4 show  $P_{\geq}(k_s)$  plotted against  $k_s$  and the four indicators used for comparing the innermost  $k$ -shells, respectively, including the results obtained with  $\text{Lvnr}$ . These figures indicate that using  $r = 0.3$  as opposed to  $r = 1$  improves the ability of the Louvain algorithm to mimic the structure of the  $k$ -shell. In Supplementary Fig. S5 we summarise the performances of the different shuffling methods including  $\text{Lvnr}$ .

Although  $\text{Lvnr}$  mimics the  $k$ -shell features better than SBM for some data sets and indicators (approximately around the 20% of the cases), SBM still attains the highest success ratio for each indicator,  $f_X$ . The few cases for which  $\text{commB-Lvnr}$  does better than  $\text{commB-SBM}$  are the networks for which the difference between the empirical  $P_{\geq}(k_s)$  and  $P_{\geq}(k_s)$  obtained from the  $\text{deg}$  shuffling apparently looks small, such as the Emails and Cookpad UK networks. In these networks, the differences between the  $P_{\geq}(k_s)$  of the networks obtained using  $\text{commB-Lvnr}$  and  $\text{commB-SBM}$  are also small. By contrast, other data sets such as Condensed Matter, Computer Science, and Words show bigger differences between their  $P_{\geq}(k_s)$  and that obtained using the  $\text{deg}$  method. In these data sets,  $\text{commB-SBM}$  is much better than  $\text{commB-Lvnr}$ , although  $\text{commB-Lvnr}$  is better than  $\text{commB-Lvnr}$ . Overall, these results suggest that the increase in the number of communities enabled by a small  $r$  does not lead to reconstruction of the  $k$ -shell structure with a better accuracy than SBM does.

| Data set       | $N_c^{\text{Lvnr}}$ | $Q^{\text{Lvnr}}$ | $N_c^{\text{SBM}}$ | $Q^{\text{SBM}}$ | $N_c^{\text{Lvnr}}$ | $Q^{\text{Lvnr}}$ |
|----------------|---------------------|-------------------|--------------------|------------------|---------------------|-------------------|
| Facebook 1     | 16                  | 0.835             | 62                 | 0.551            | 29                  | 0.819             |
| Facebook 2     | 19                  | 0.419             | 198                | 0.158            | 67                  | 0.348             |
| Facebook 3     | 8                   | 0.436             | 87                 | 0.139            | 36                  | 0.294             |
| Facebook 4     | 10                  | 0.438             | 274                | 0.193            | 72                  | 0.381             |
| Facebook 5     | 18                  | 0.470             | 547                | 0.172            | 92                  | 0.417             |
| Twitter        | 73                  | 0.808             | 510                | 0.511            | 136                 | 0.779             |
| Web-blogs      | 275                 | 0.426             | 17                 | 0.076            | 331                 | 0.150             |
| Emails         | 26                  | 0.410             | 33                 | 0.232            | 61                  | 0.350             |
| Cond. Matter   | 619                 | 0.730             | 203                | 0.633            | 716                 | 0.718             |
| Comp. Science  | 209                 | 0.822             | 676                | 0.726            | 438                 | 0.812             |
| Global airline | 26                  | 0.665             | 40                 | 0.311            | 55                  | 0.542             |
| Words          | 378                 | 0.759             | 548                | 0.583            | 523                 | 0.747             |
| Cookpad Greece | 40                  | 0.166             | 76                 | 0.020            | 365                 | 0.067             |
| Cookpad Spain  | 262                 | 0.270             | 90                 | 0.035            | 501                 | 0.164             |
| Cookpad UK     | 199                 | 0.350             | 8                  | 0.114            | 320                 | 0.314             |

Supplementary Table S2: Summary of the properties of the community structures of the data sets analysed using different community detection methods. For each pair (network, method) we computed the number of communities,  $N_c$ , and the value of the modularity  $Q$ . Each pair of columns accounts for a different method, namely: Louvain ( $\text{Lvnr}$ ), stochastic block model (SBM), and Louvain with a resolution parameter  $r = 0.3$  ( $\text{Lvnr}$ ).

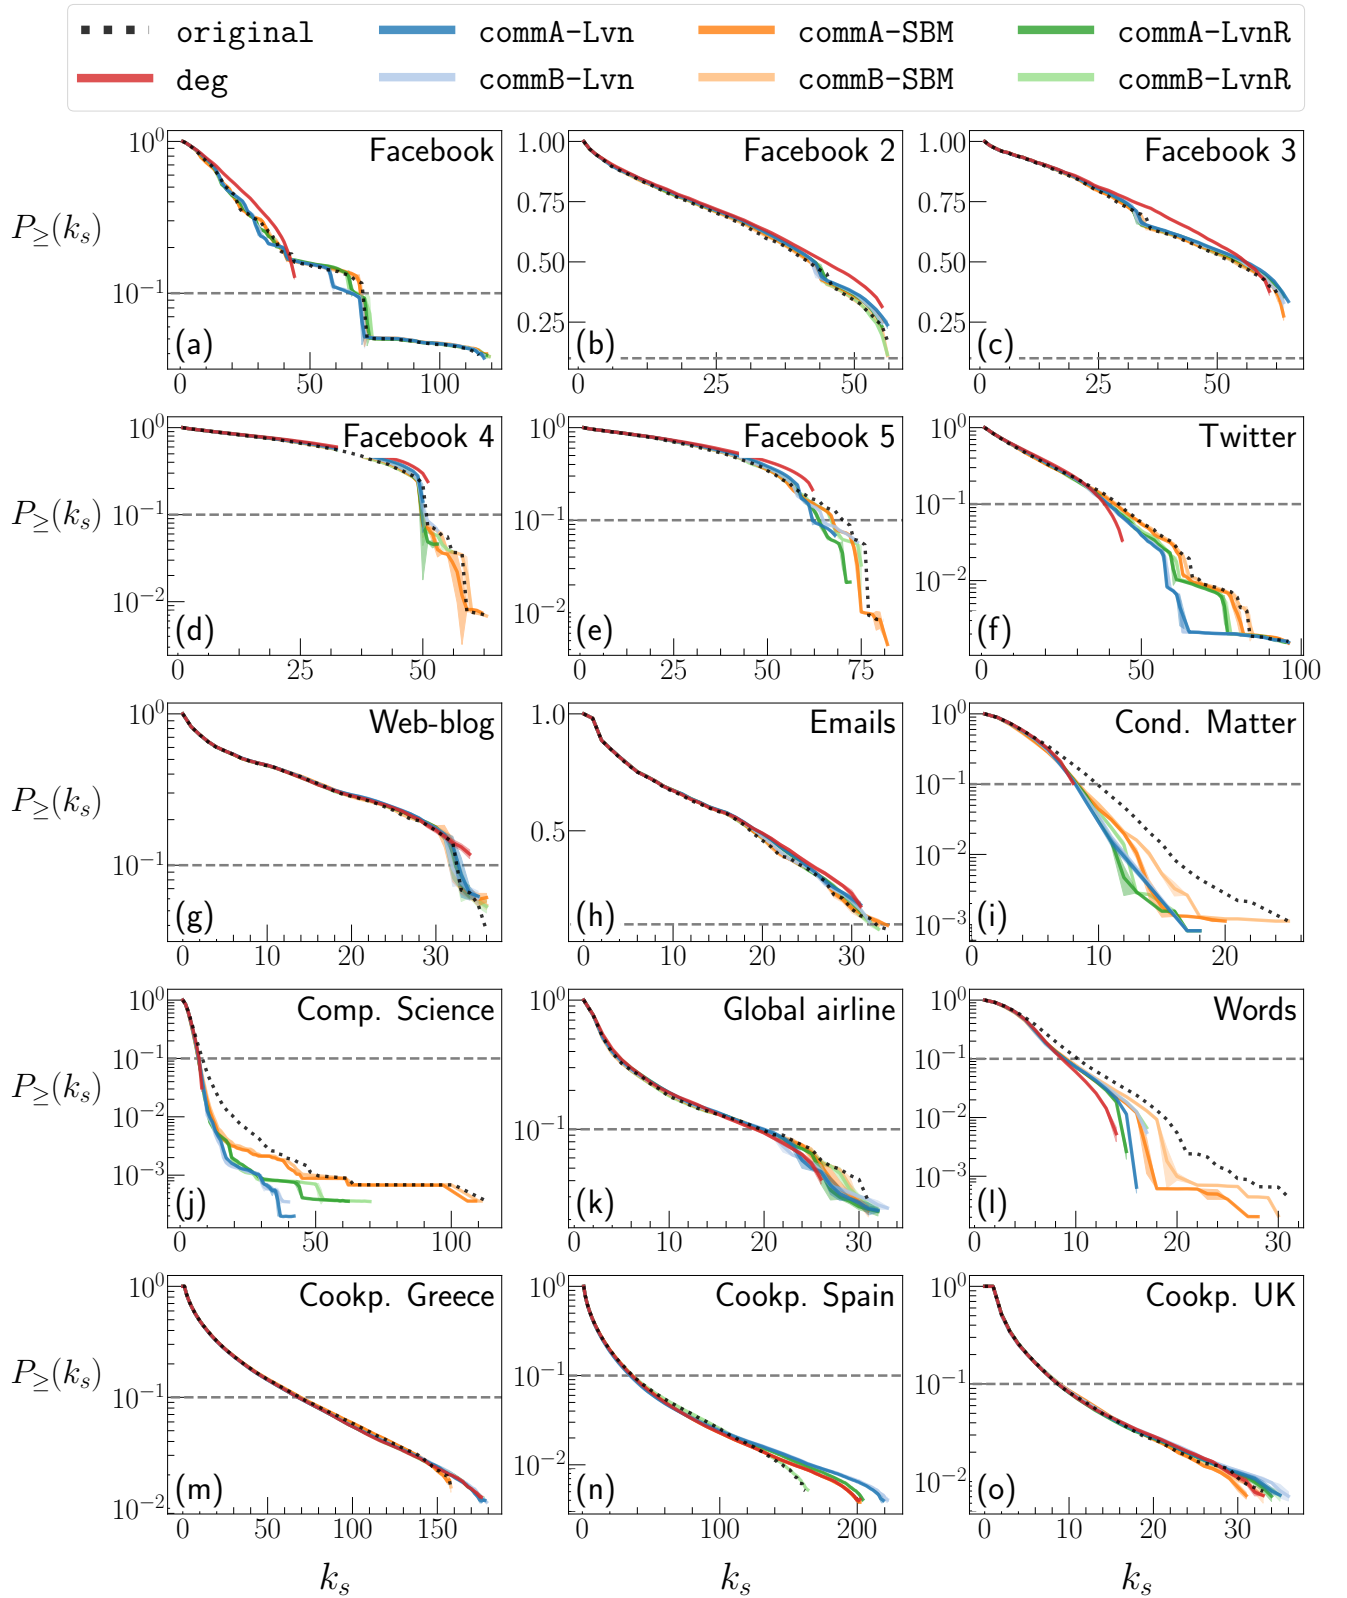

Supplementary Figure S3: Survival function of the probability distribution of the  $k$ -shell index,  $P_{\ge}(k_s)$ , as a function of  $k_s$  for all the cases considered in Fig. 1 plus the cases in which we identify communities using the Louvain method with a resolution parameter of  $r = 0.3$ . See the caption or Supplementary Fig. S1 for notations and legends.

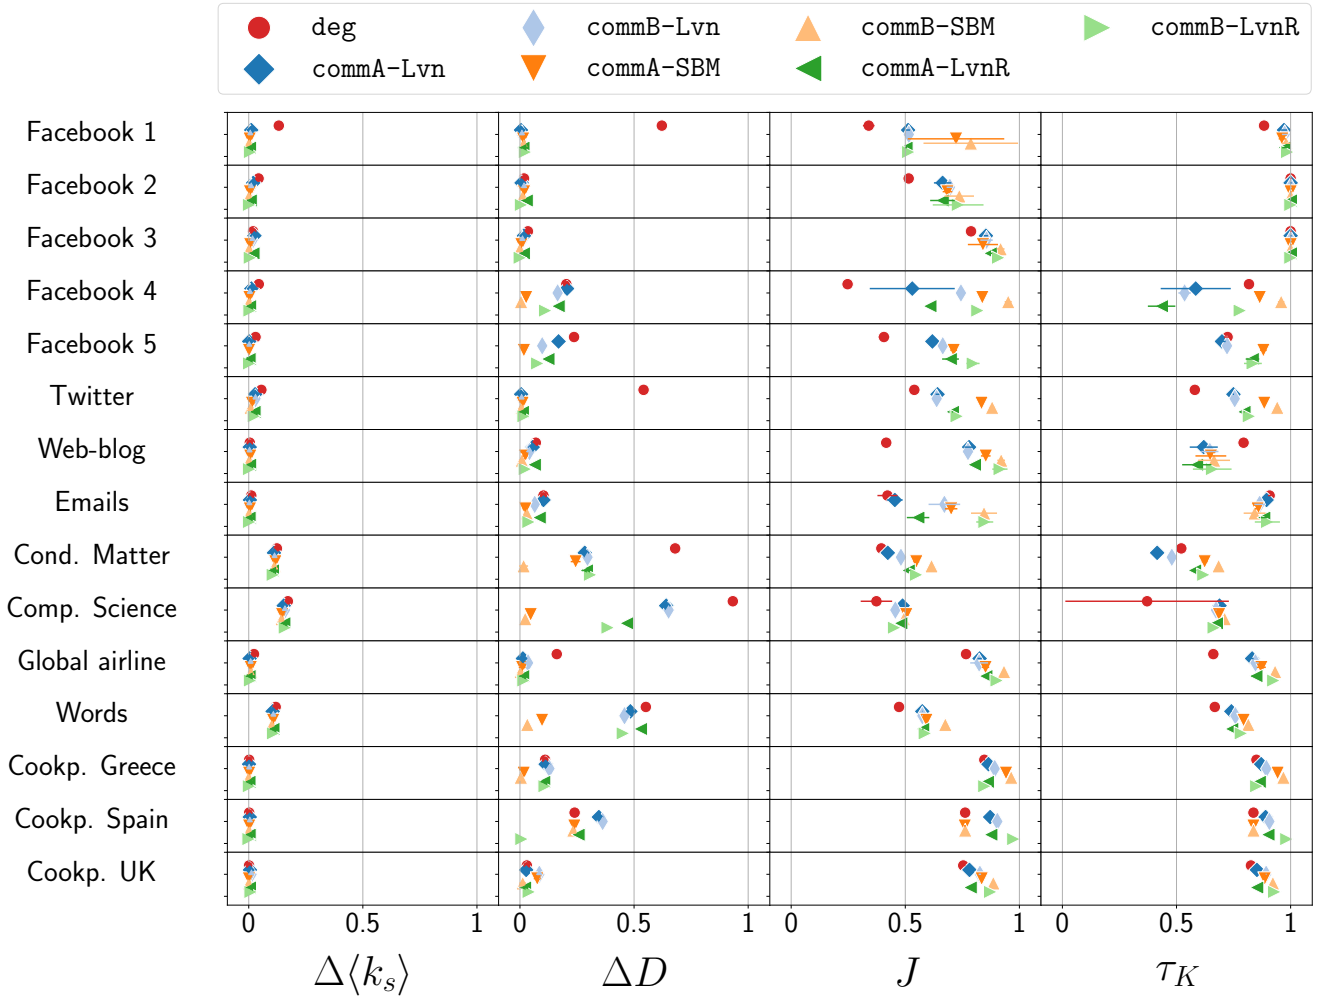

Supplementary Figure S4: Graphical summary of the average and standard deviation of the four indicators characterising the  $k$ -core decomposition. In addition to the information displayed in Supplementary Fig. S2, we consider the community structure detected by the Louvain method with  $r = 0.3$  (LvnR). See the caption or Supplementary Fig. S2 for notations and legends.

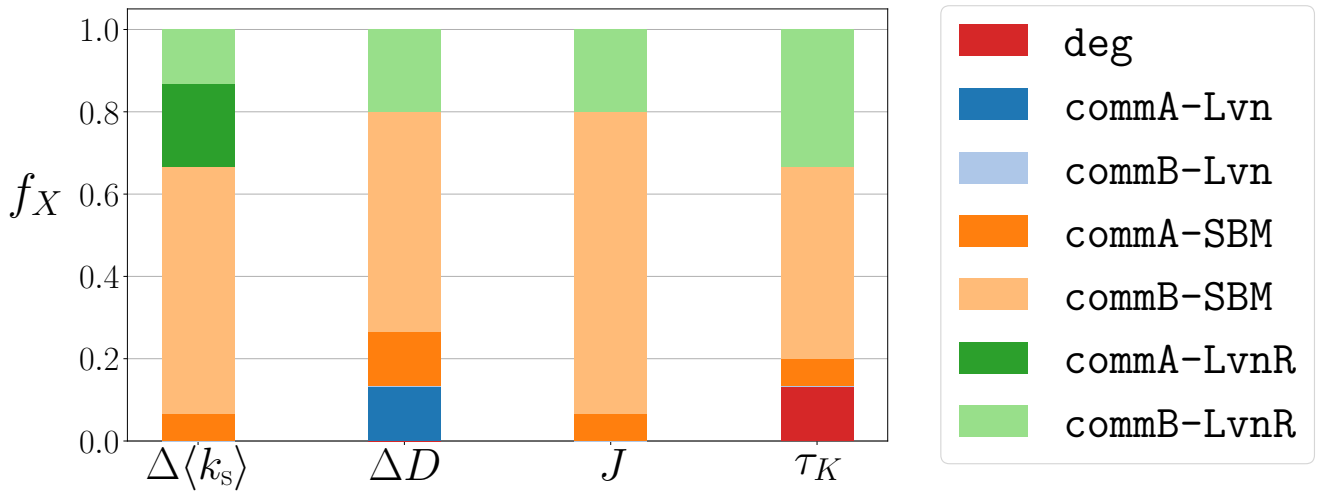

Supplementary Figure S5: Summary of the performances of the different shuffling methods in reproducing the features of the  $k$ -shells according to four indicators. We report the fraction of data sets for which a given combination of the shuffling method and the community detection method yields an indicator's value closest to that for the original network. In addition to the methods considered in Fig. 2, we also consider the case of the communities extracted using the Louvain method with  $r = 0.3$ . See the caption or Fig. 2 for notations and legends.

To investigate which features of the SBM and Louvain algorithms are responsible for the difference in their performances, we study the average of the size of the communities to which nodes of a certain  $k$ -shell belong,  $\langle s_C \rangle$ , as a function of the  $k$ -shell index,  $k_s$ . In Supplementary Fig. S6, we observe how  $\langle s_C \rangle$  of the communities found by the Louvain method (LVN) stays nearly constant across the entire range of  $k_s$  values. By contrast, with SBM,  $\langle s_C \rangle$  monotonically decreases as  $k_s$  increases, such that nodes in inner  $k$ -shells tend to belong to smaller communities. Although a high resolution (*i.e.*, a small  $r$  value) in the Louvain method produces a large number of communities (see Supplementary Table S2), the behaviour of  $\langle s_C \rangle$  for LVN and LVNR is similar, with the major difference that the value of  $\langle s_C \rangle$  is smaller for LVNR.

These results altogether lead us to conclude that our method combined with the community structure identified using the Louvain method with a higher resolution does not outperform our method combined with SBM in grasping the features of the  $k$ -core decomposition. This may be because SBM is capable of finding more universal mesostructures than those found by the Louvain method [4–6].



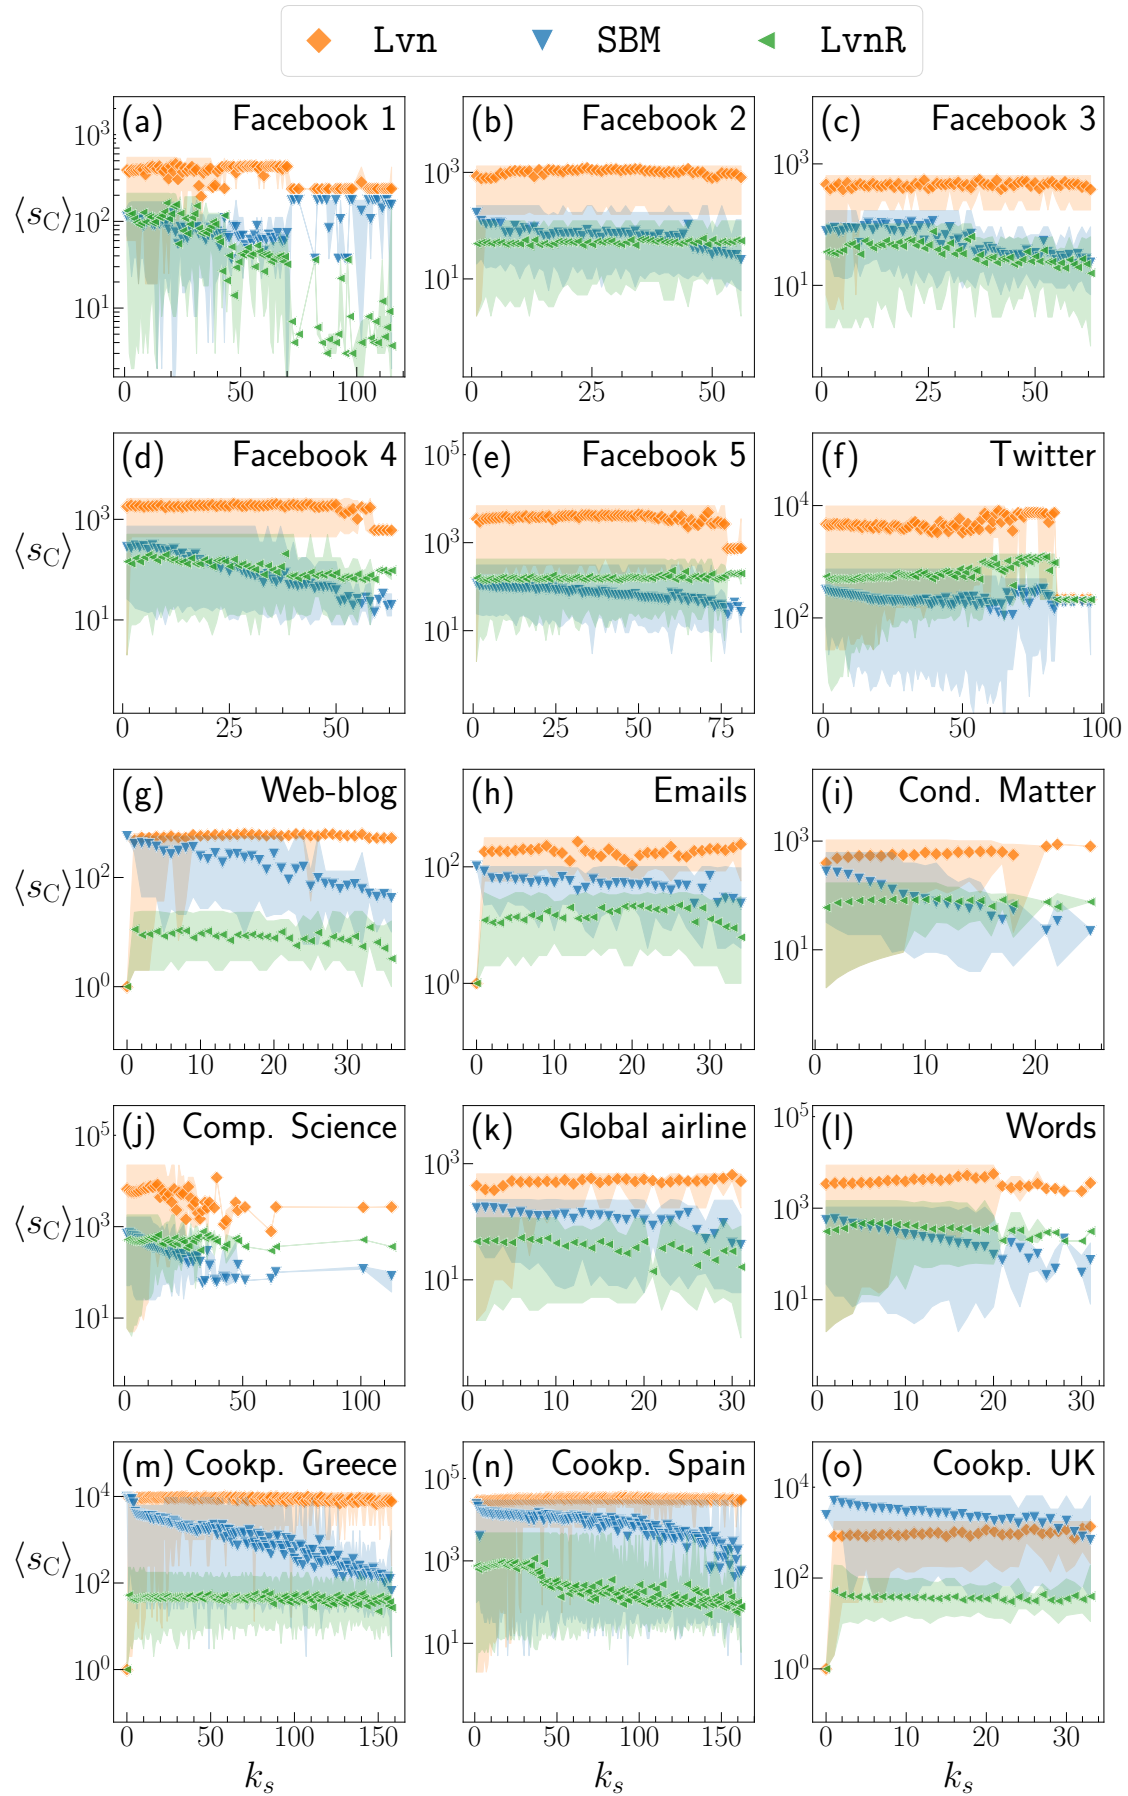

Supplementary Figure S6: Average size of the communities to which the nodes having  $k$ -shell index  $k_s$  belong to,  $\langle s_C \rangle$ , versus  $k_s$ . We identify the community structure using either the Louvain (Lvn), the stochastic block model (SBM), or the Louvain with higher resolution (LvnR) methods. The resolution parameter for (LvnR) is equal to  $r = 0.3$ . Shaded areas denote the standard deviation. Each panel accounts for a different data set.

### 3 The LFR model

The Lancichinetti-Fortunato-Radicchi (LFR) model generates networks where both the node’s degree and the size of the communities (*i.e.*, the number of nodes belonging to a community) follow power-law distributions [7]. Such features are found in many empirical networks [8] and have led to the success of the LFR model as generator of benchmark networks to test community detection algorithms [2]. A main finding presented in the main text is that preserving the community structure of the original network in addition to the degree of each node improves the ability of the shuffling methods to mimic the  $k$ -core decomposition of the original networks. Here, to test whether or not the community structure and the degree of each node, but not a possible intricate association between the two, is sufficient for mimicking the features of  $k$ -core decomposition observed for many empirical networks, we generated networks using the LFR model and analysed their  $k$ -cores and those of the shuffled counterparts.

The LFR algorithm depends on the following parameters: the exponent,  $t_1 \in [2, 3]$ , of the degree distribution  $P(k) \propto k^{-t_1}$ ; the exponent,  $t_2 \in [1, 2]$ , of the community’s size distribution  $P(S_c) \propto S_c^{-t_2}$ ; the mixing parameter,  $\mu \in [0, 1]$ , specifying the fraction of intra-community edges for a node. A value of  $\mu = 0$  indicates that a node is connected only with nodes belonging to communities different from its own. A value of  $\mu = 1$  indicates that a node is connected exclusively with nodes belonging to its own community; either one of the following: the average degree,  $\langle k \rangle$ , the minimum degree,  $k_{\min}$ , or the minimum number of communities,  $\min N_c$ . This stochastic algorithm may not produce a network fulfilling all the requirements in some realisations. Therefore, we have to set the parameter values to ensure the algorithm’s convergence.

To encompass a good spectrum of networks, we consider four batches of parameter sets, which are summarised in Supplementary Table S3, together with the properties of the generated networks. Each batch of parameter sets consists of a value of  $t_1$ , a value of  $t_2$ , and seven values of  $\mu$  ranging from 0.1 to 0.8. We assumed  $N = 10000$  nodes and used the implementation of the LFR algorithm in the NetworkX Python package [9].

For each network generated, we extracted its  $k$ -core decomposition and calculated the four indicators. We did the same for the shuffled counterparts generated using the `deg`, `commA`, and `commB` methods. In analogy to Supplementary Fig. S1, in Supplementary Figs. S7–S10 we show the survival function of the probability distribution of the  $k$ -shell index,  $P_{\geq}(k_s)$ , for the original LFR networks and the shuffled counterparts, one figure per each  $(t_1, t_2)$  pair. An eye inspection of Supplementary Figs. S7–S10 highlights the existence of three trends.

First, Supplementary Figs. S7 and S8 indicate that, in networks generated using the smaller  $t_1$  values (*i.e.*, parameters batches 1 and 2 in Supplementary Table S3), the shuffled networks generated by `deg`, `commA-Lvn`, and `commB-Lvn` attain a  $k$ -core decomposition with a degeneracy,  $D$ , considerably higher than the original one. In contrast, Supplementary Figs. S9 and S10 indicate that, with the larger  $t_1$  values (*i.e.*, parameter batches 3 and 4), we recover the same trend as that shown in Fig. 1. In other words,  $D$  for the original networks are larger than that for the shuffled networks. The difference between the original  $D$  and its shuffled counterpart seems to be influenced by the value of  $t_1$ , but not  $t_2$  or  $\mu$ .

Second,  $P_{\geq}(k_s)$  for the original LFR networks mainly decreases smoothly as  $k_s$  increases, without plateaus or abrupt drops. Therefore, the  $k$ -core decomposition of LFR networks does not return any  $k$ -shell that is empty or much more populated than its adjacent  $k$ -shells. This result is in stark contrast to that for various empirical networks, *e.g.*, the Facebook 1 data set (see Supplementary Fig. S1).

Third, regardless of the values of  $t_1$ ,  $t_2$ , and  $\mu$ , the `commB-SBM` shuffling method produces networks with the  $P_{\geq}(k_s)$  more akin to the original one than the other shuffling methods do. This result is consistent with that for the empirical networks presented in the main text.

In a nutshell, the analysis of the  $k$ -core decomposition of networks generated by the LFR model reveals that the presence of communities is not enough to justify main properties of the  $k$ -shell structure observed in the empirical networks.

| LFR parameters             |       | $L$    | $k_{\min}$ | $\langle k \rangle$ | $k_{\max}$ | $\langle k_s \rangle$ | $D$ | $N_c^{\text{Lvn}}$ | $Q^{\text{Lvn}}$ | $N_c^{\text{SBM}}$ | $Q^{\text{SBM}}$ |
|----------------------------|-------|--------|------------|---------------------|------------|-----------------------|-----|--------------------|------------------|--------------------|------------------|
| $t_1, t_2$                 | $\mu$ |        |            |                     |            |                       |     |                    |                  |                    |                  |
| <b>Parameter batch 1</b>   |       |        |            |                     |            |                       |     |                    |                  |                    |                  |
| $t_1 = 2.2$<br>$t_2 = 1.5$ | 0.1   | 120893 | 4          | 24.179              | 3470       | 12.541                | 16  | 10                 | 0.673            | 29                 | 0.041            |
|                            | 0.2   | 116200 | 4          | 23.240              | 3380       | 12.201                | 14  | 4                  | 0.497            | 16                 | -0.006           |
|                            | 0.3   | 118260 | 4          | 23.652              | 3199       | 12.188                | 14  | 7                  | 0.458            | 26                 | -0.002           |
|                            | 0.4   | 118547 | 4          | 23.709              | 6309       | 12.287                | 14  | 7                  | 0.234            | 19                 | -0.053           |
|                            | 0.5   | 130304 | 4          | 26.061              | 4481       | 12.548                | 16  | 7                  | 0.250            | 24                 | -0.038           |
|                            | 0.6   | 126277 | 4          | 25.255              | 4607       | 12.967                | 15  | 10                 | 0.164            | 8                  | -0.151           |
|                            | 0.8   | 118032 | 4          | 23.606              | 4028       | 12.263                | 14  | 10                 | 0.162            | 5                  | -0.156           |
| <b>Parameter batch 2</b>   |       |        |            |                     |            |                       |     |                    |                  |                    |                  |
| $t_1 = 2.6$<br>$t_2 = 2.0$ | 0.1   | 132920 | 8          | 26.584              | 2474       | 14.277                | 16  | 5                  | 0.651            | 16                 | 0.118            |
|                            | 0.2   | 129069 | 8          | 25.814              | 1641       | 14.186                | 15  | 8                  | 0.595            | 22                 | 0.139            |
|                            | 0.3   | 129024 | 8          | 25.805              | 1287       | 14.138                | 15  | 9                  | 0.487            | 26                 | 0.091            |
|                            | 0.4   | 128606 | 8          | 25.721              | 3305       | 14.015                | 15  | 7                  | 0.222            | 9                  | -0.020           |
|                            | 0.5   | 127596 | 8          | 25.519              | 1504       | 14.105                | 15  | 8                  | 0.227            | 20                 | 0.041            |
|                            | 0.6   | 131024 | 8          | 26.205              | 1287       | 14.165                | 15  | 7                  | 0.178            | 5                  | -0.093           |
|                            | 0.8   | 133017 | 8          | 26.603              | 4436       | 14.665                | 16  | 8                  | 0.166            | 8                  | -0.087           |
| <b>Parameter batch 3</b>   |       |        |            |                     |            |                       |     |                    |                  |                    |                  |
| $t_1 = 2.9$<br>$t_2 = 1.5$ | 0.1   | 315105 | 24         | 63.012              | 4249       | 35.907                | 37  | 4                  | 0.511            | 14                 | 0.115            |
|                            | 0.2   | 320836 | 24         | 64.167              | 2439       | 36.362                | 37  | 12                 | 0.584            | 31                 | 0.179            |
|                            | 0.3   | 319482 | 24         | 63.896              | 3732       | 36.234                | 37  | 10                 | 0.359            | 29                 | 0.078            |
|                            | 0.4   | 319070 | 24         | 63.814              | 2371       | 36.102                | 37  | 11                 | 0.314            | 30                 | 0.063            |
|                            | 0.5   | 321222 | 24         | 64.244              | 2795       | 36.816                | 38  | 9                  | 0.204            | 27                 | 0.029            |
|                            | 0.6   | 317738 | 24         | 63.548              | 2371       | 36.019                | 37  | 8                  | 0.146            | 18                 | 0.016            |
|                            | 0.8   | 305945 | 24         | 61.189              | 2246       | 35.049                | 36  | 9                  | 0.109            | 4                  | -0.052           |
| <b>Parameter batch 4</b>   |       |        |            |                     |            |                       |     |                    |                  |                    |                  |
| $t_1 = 3.0$<br>$t_2 = 2.0$ | 0.1   | 247311 | 20         | 49.462              | 2819       | 28.561                | 31  | 31                 | 0.740            | 57                 | 0.323            |
|                            | 0.2   | 246506 | 20         | 49.301              | 1228       | 27.691                | 28  | 40                 | 0.651            | 69                 | 0.331            |
|                            | 0.3   | 254822 | 20         | 50.964              | 1779       | 29.468                | 30  | 29                 | 0.484            | 50                 | 0.224            |
|                            | 0.4   | 249528 | 20         | 49.906              | 1131       | 28.457                | 29  | 37                 | 0.387            | 71                 | 0.156            |
|                            | 0.5   | 254371 | 20         | 50.874              | 2668       | 29.120                | 30  | 17                 | 0.211            | 42                 | 0.070            |
|                            | 0.6   | 243746 | 20         | 48.749              | 1097       | 28.311                | 29  | 20                 | 0.186            | 50                 | 0.073            |
|                            | 0.8   | 251094 | 20         | 50.219              | 3569       | 28.364                | 29  | 9                  | 0.119            | 4                  | -0.053           |

Supplementary Table S3: Summary of the properties of the networks generated with the LFR model. For each combination of parameters  $t_1$ ,  $t_2$ , and  $\mu$  we report the number of edges,  $L$ , minimum degree,  $k_{\min}$ , average degree,  $\langle k \rangle$ , maximum degree,  $k_{\max}$ , degeneracy,  $D$ , number of communities,  $N_c$ , and modularity,  $Q$ , for communities extracted using either the Louvain (Lvn) or stochastic block model (SBM) method. All networks have  $N = 10000$  nodes.

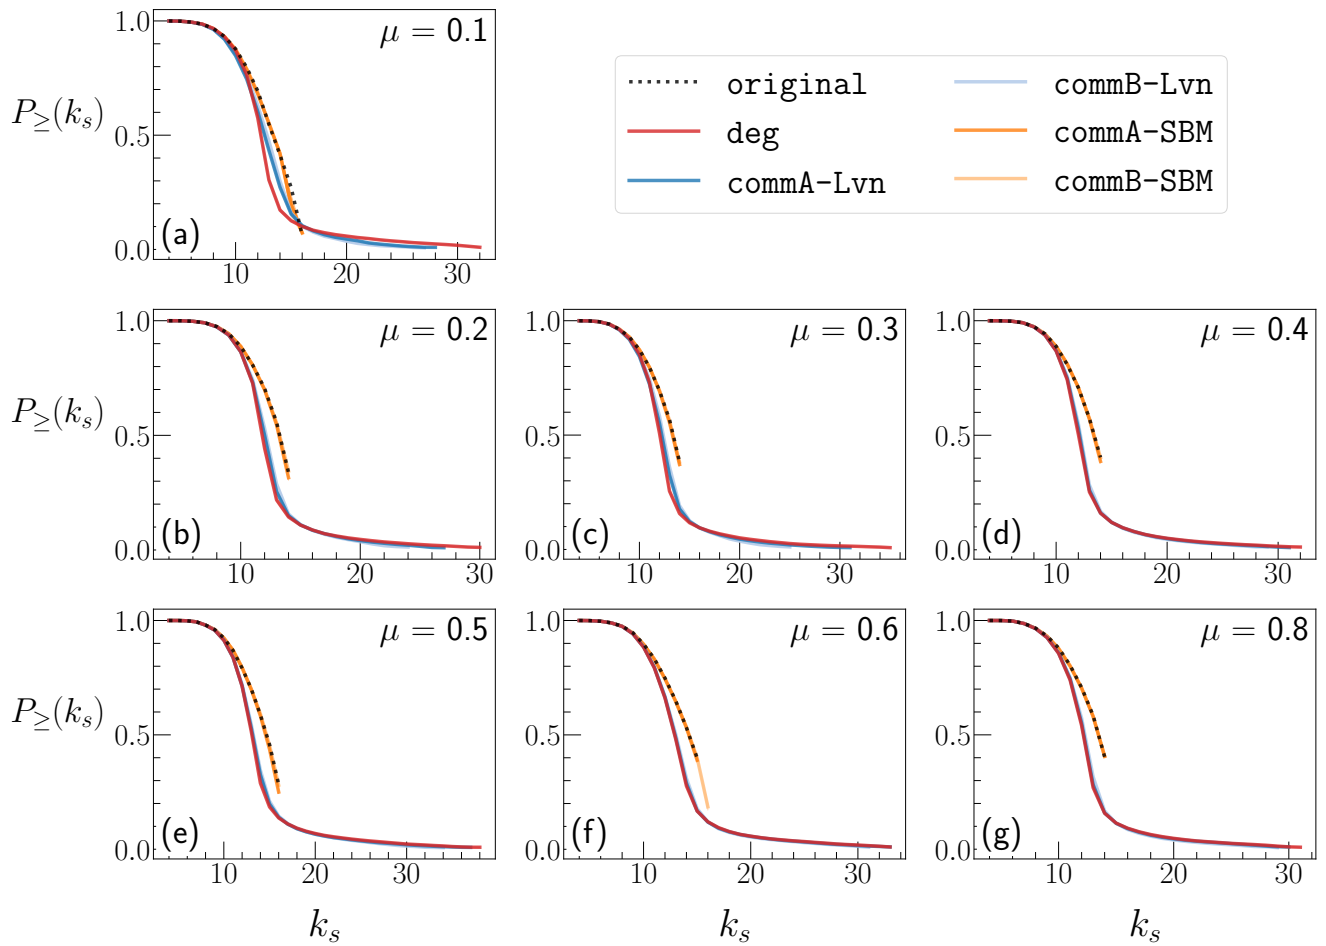

Supplementary Figure S7: Survival function of the probability distribution,  $P_{\ge}(k_s)$ , of the  $k$ -shell index,  $k_s$ , for the LFR networks generated using parameter batch 1 (*i.e.*, with  $t_1 = 2.2$  and  $t_2 = 1.5$ ; see Supplementary Table S3). The dotted lines correspond to the original network. The solid lines correspond to shuffled networks. Each panel corresponds to a value of  $\mu$ . Shuffled results are averages over 10 realisations. The shaded area corresponds to the standard deviation. All networks have  $N = 10000$  nodes.

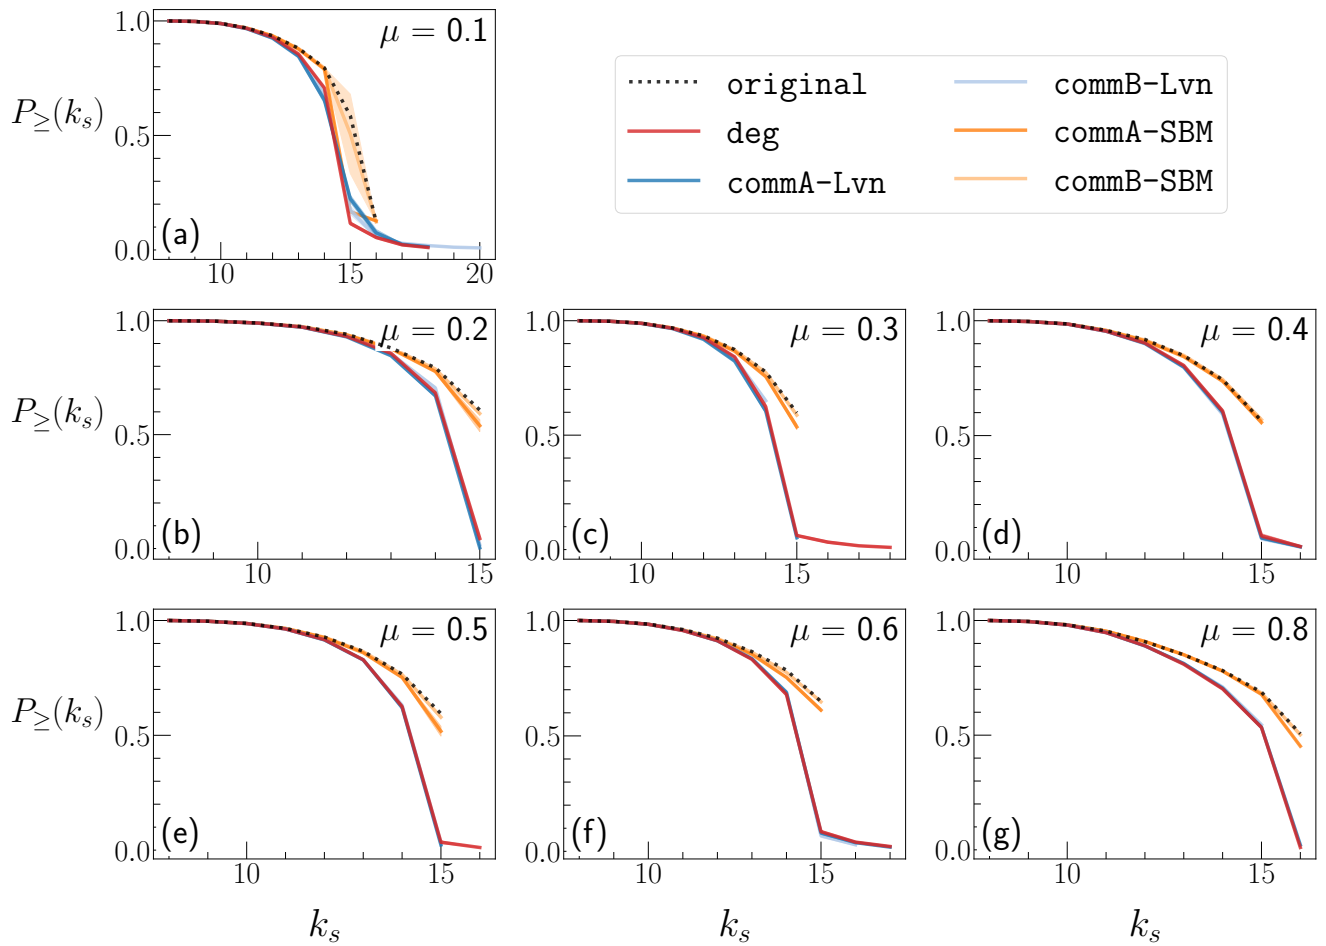

Supplementary Figure S8: Survival function of the probability distribution,  $P_{\ge}(k_s)$ , of the  $k$ -shell index,  $k_s$ , for the LFR networks generated using parameter batch 2 (*i.e.*, with  $t_1 = 2.6$  and  $t_2 = 2.0$ ; see Supplementary Table S3). See the caption or Supplementary Fig. S7 for notations and legends.

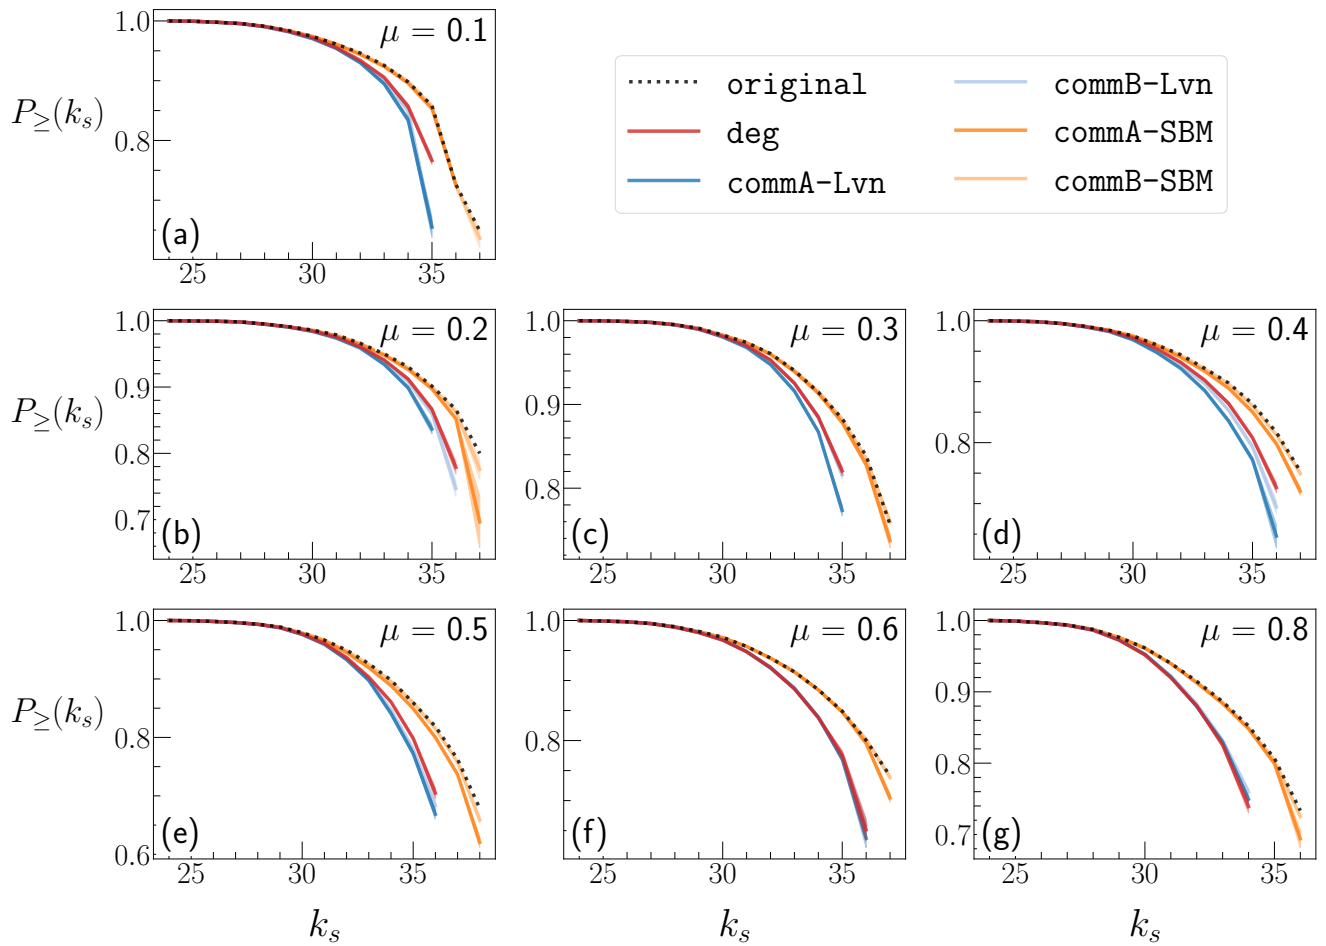

Supplementary Figure S9: Survival function of the probability distribution,  $P_{\ge}(k_s)$ , of the  $k$ -shell index,  $k_s$ , for the LFR networks generated using parameter batch 3 (*i.e.*, with  $t_1 = 2.9$  and  $t_2 = 1.5$ ; see Supplementary Table S3). See the caption or Supplementary Fig. S7 for notations and legends.

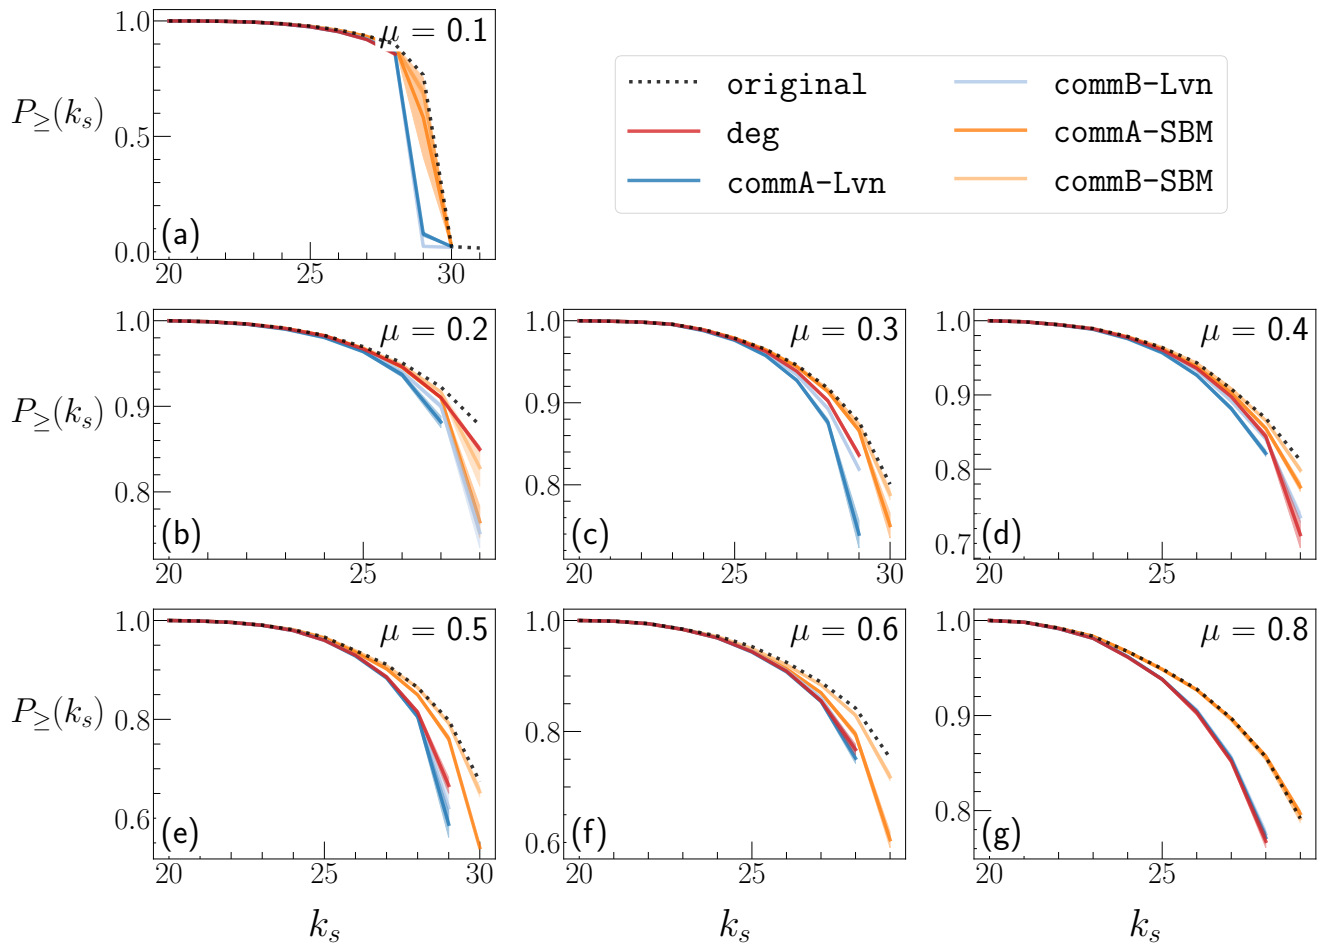

Supplementary Figure S10: Survival function of the probability distribution,  $P_{\ge}(k_s)$ , of the  $k$ -shell index,  $k_s$ , for the LFR networks generated using parameter batch 4 (*i.e.*, with  $t_1 = 3.0$  and  $t_2 = 2.0$ ; see Supplementary Table S3). See the caption or Supplementary Fig. S7 for notations and legends.

## 4 Relationship between community structure and $k$ -core decomposition

In this section, we examine the number of communities to which the nodes in each  $k$ -shell belong, with the aim of examining whether or not those nodes are concentrated into one or a small number of communities, particularly for nodes in innermost  $k$ -shells. This analysis is similar to Supplementary Fig. S6, whereas in that case we focused on the averaged community size. Supplementary Figure S11 shows the number of distinct communities to which the nodes with a given  $k_s$  value belong, denoted by  $n_C(k_s)$ , for all the data sets. In agreement with Fig. 3, some data sets show a strong concentration of the innermost  $k$ -shells (*i.e.*, nodes with large  $k_s$  values) into one or a few communities.

Next, we ask whether or not the number of communities across which each  $k$ -shell is distributed is a byproduct of random interactions. To answer this question, first, for each network, we extract communities using either `LVDN` or `SBM`. Second, we compute  $n_C(k_s)$  for each  $k_s$ . Third, we compute the same quantity for the case in which we permute the association between the  $k$ -shell index of each node,  $k_s(i)$ , and the community membership of the node,  $g(i)$ , uniformly at random; in fact, it is sufficient to randomly permute either  $\{k_s(1), \dots, k_s(N)\}$  or  $\{g(1), \dots, g(N)\}$ , not both. Fourth, we calculate the number of communities to which the set of nodes with a given  $k_s$  value belong after the permutation, which is denoted by  $n_C^S(k_s)$ . Fifth, using an approach similar to the calculation of the rich-club coefficient [10], we compute

$$\varphi(k_s) = \frac{n_C^S(k_s)}{n_C(k_s)} \quad (\text{S1})$$

for each  $k_s$ . A value of  $\varphi(k_s)$  larger (smaller) than 1 indicates that the number of communities to which the nodes having the  $k_s$  value belong is smaller (larger) than in the case of the randomised association between the nodes and communities. Therefore,  $\varphi(k_s)$  larger than 1 implies that the nodes with the given  $k$ -shell index,  $k_s$ , are concentrated into a relatively small number of communities as compared to randomised counterparts.

In Supplementary Fig. S12 we plot  $\varphi(k_s)$  against  $k_s$  for all the data sets. We observe that, with the exception of the Spanish and British Cookpad's networks,  $\varphi(k_s)$  tends to be larger than 1. This result implies that, on average, nodes of a given  $k$ -shell tend to belong to less communities than the randomised case. We stress that the permutation of either the  $k$ -shell index or the community membership sequences may return networks whose  $k$ -shell and community structure are not physically plausible. For instance, if a node  $i$  receives a  $k$ -shell index value of  $\alpha$  upon randomisation and  $\alpha$  is larger than  $k_i$  (*i.e.*, degree of node  $i$ ), then the node cannot belong to the corresponding  $k$ -shell.



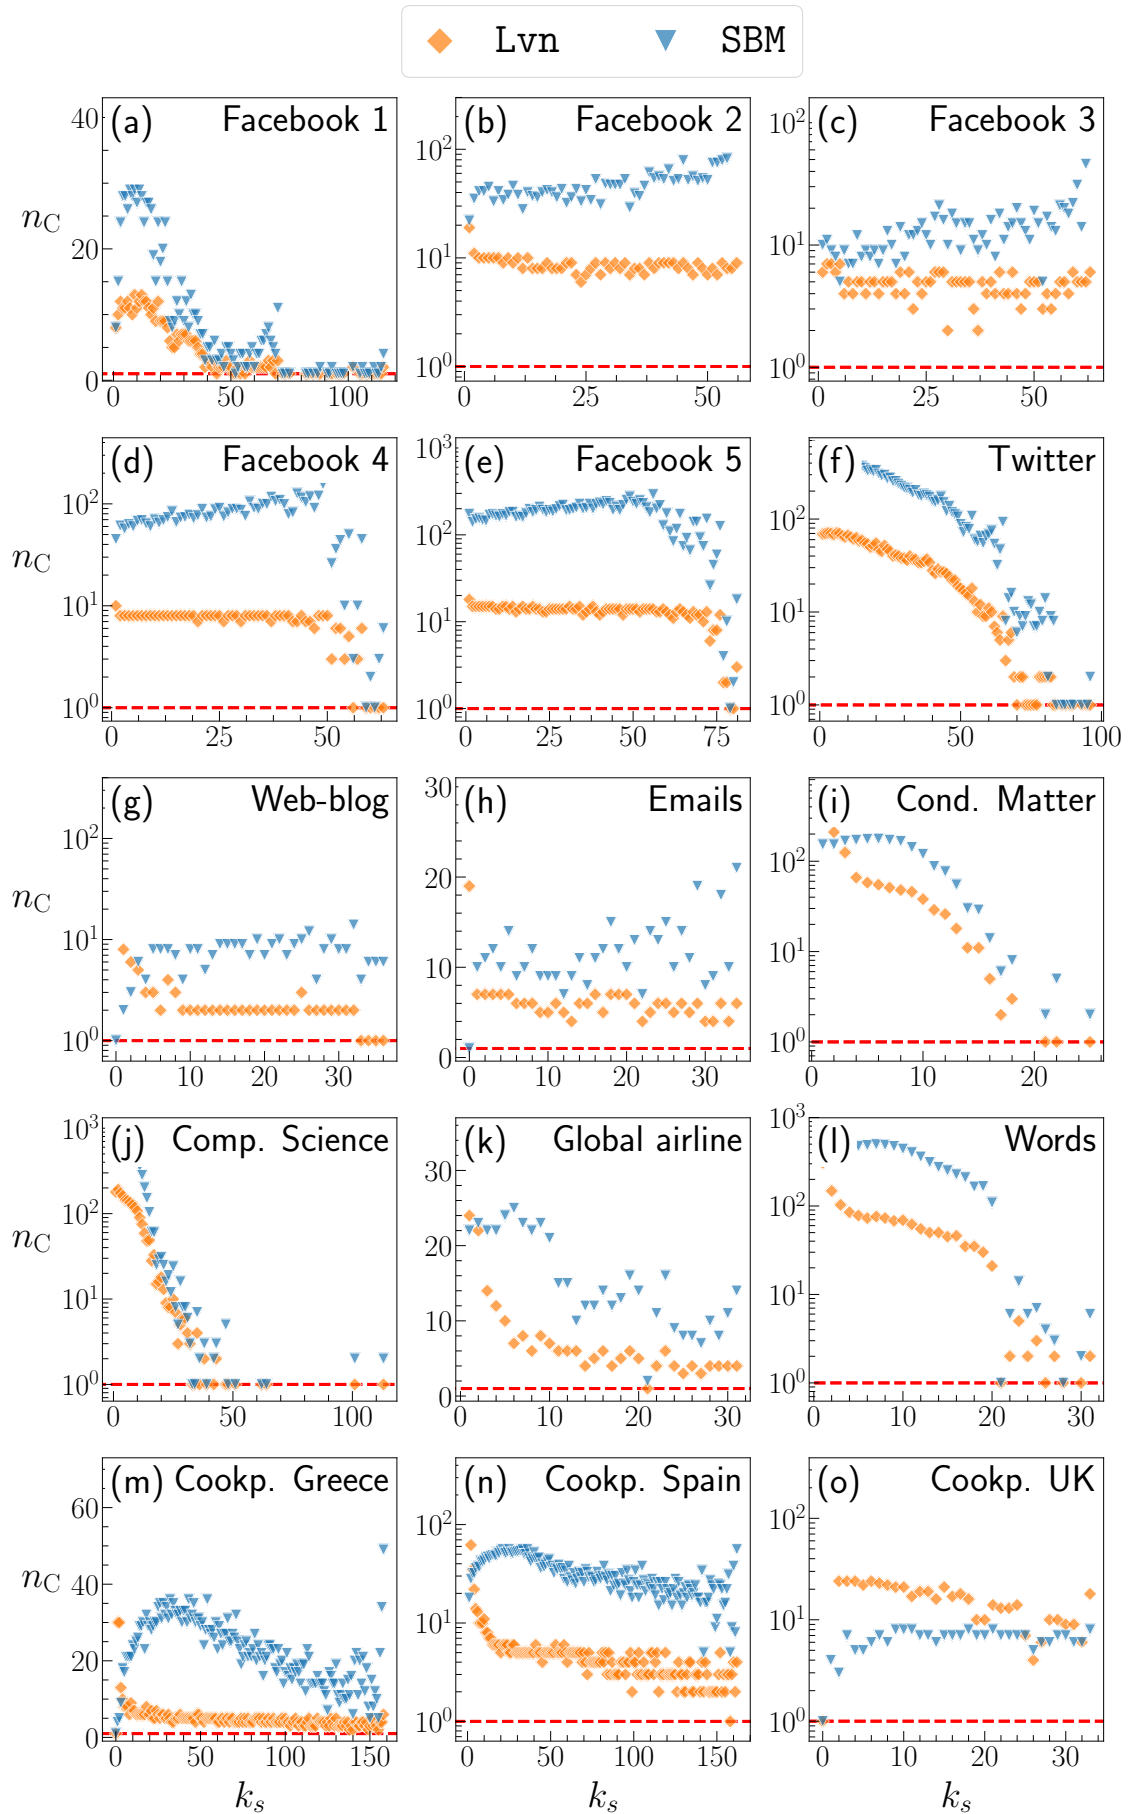

Supplementary Figure S11: Number of communities,  $n_C(k_s)$ , to which the nodes having  $k$ -shell index  $k_s$  belong. The horizontal line is a guide to the eyes representing  $n_C(k_s) = 1$ . We identified the community structure using either Lvn or SBM. Each panel accounts for a different data set.

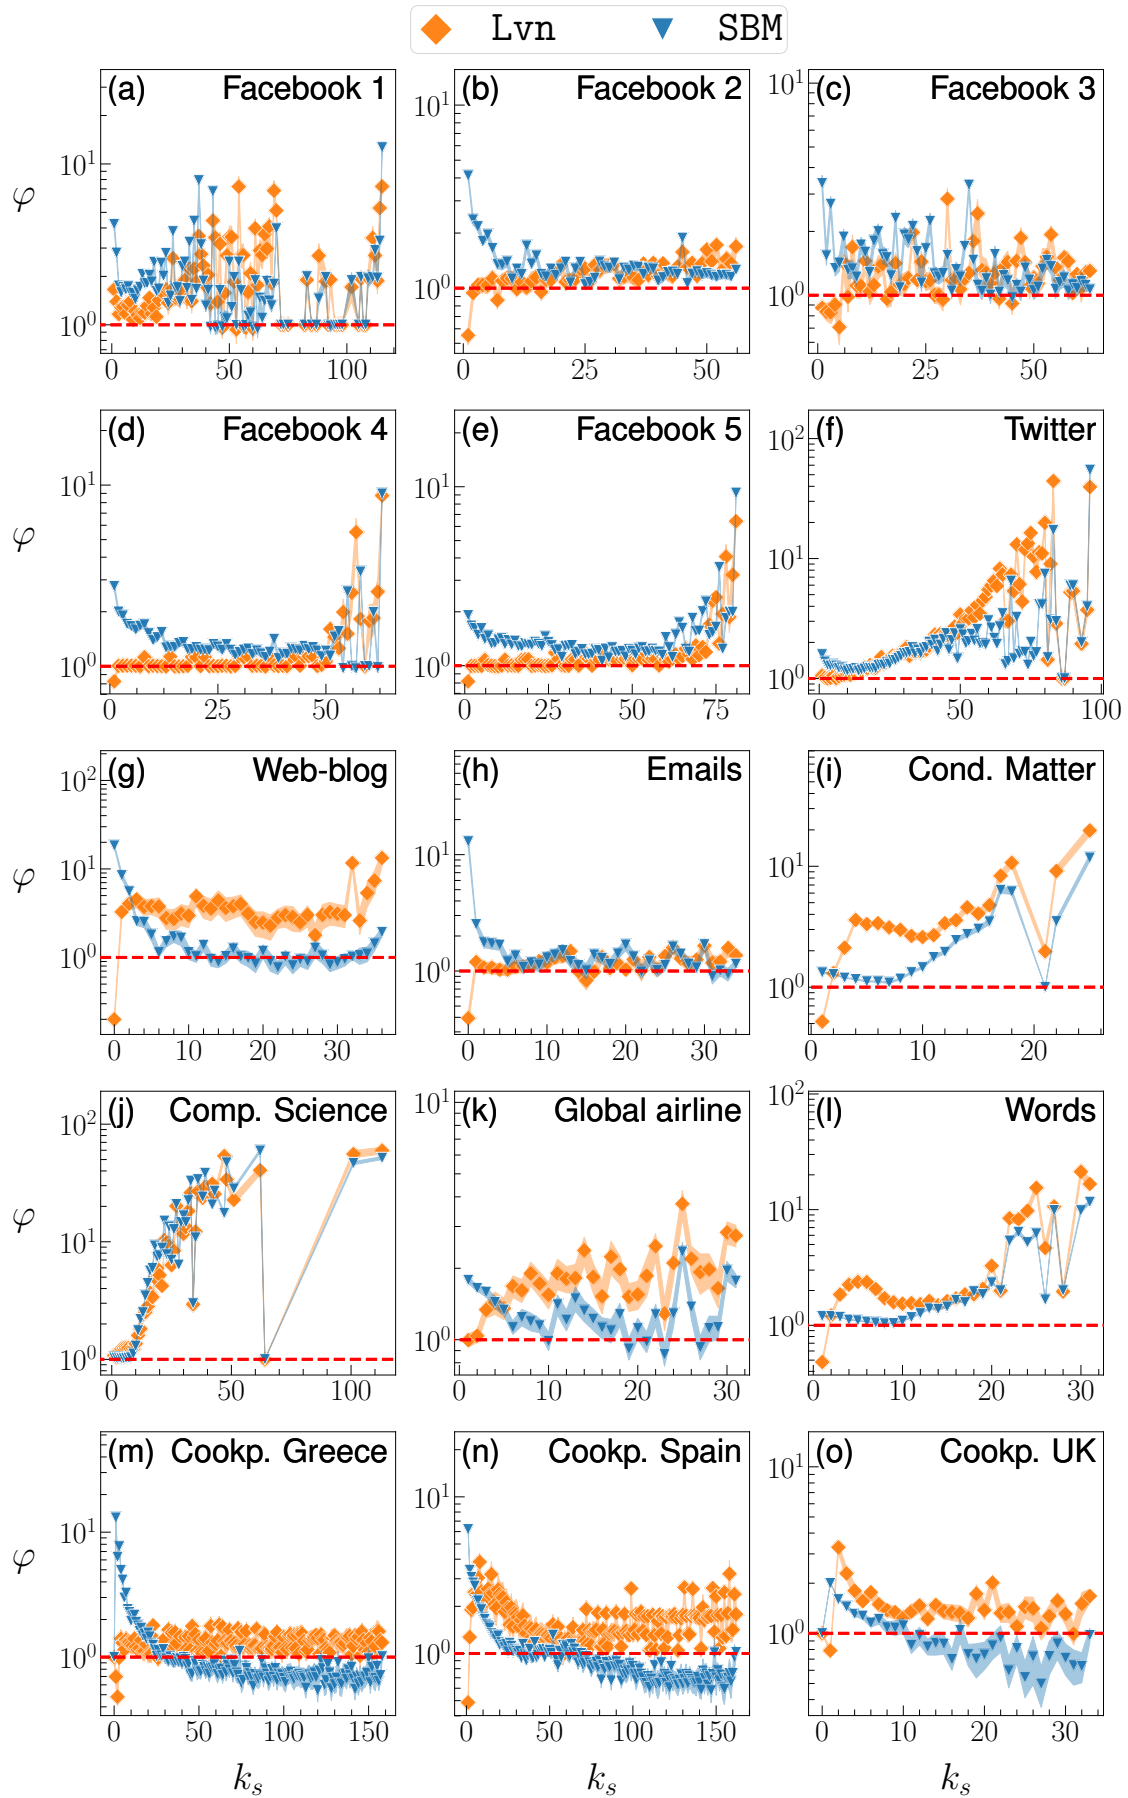

Supplementary Figure S12: Ratio,  $\varphi(k_s)$ , (see (S1)) plotted against the  $k$ -shell index,  $k_s$ , for all the data sets. We identified the community structure using either Lvn or SBM. Each panel accounts for a different data set. Results are averaged over one hundred runs of randomisation between the association between the node's  $k$ -shell index and community label. The horizontal dashed lines represent  $\varphi(k_s) = 1$ .

## References

- [1] Fortunato, S. & Barthélemy, M. Resolution limit in community detection. *Proceedings of the National Academy of Sciences of the United States of America* **104**, 36–41, DOI: 10.1073/pnas.0605965104 (2007).
- [2] Fortunato, S. & Hric, D. Community detection in networks: A user guide. *Physics Reports* **659**, 1–44, DOI: 10.1016/j.physrep.2016.09.002 (2016).
- [3] Lambiotte, R., Delvenne, J. C. & Barahona, M. Random walks, Markov processes and the multiscale modular organization of complex networks. *IEEE Transactions on Network Science and Engineering* **1**, 76–90, DOI: 10.1109/TNSE.2015.2391998 (2014).
- [4] Olhede, S. C. & Wolfe, P. J. Network histograms and universality of blockmodel approximation. *Proceedings of the National Academy of Sciences of the United States of America* **111**, 14722–14727, DOI: 10.1073/pnas.1400374111 (2014).
- [5] Newman, M. E. J. Equivalence between modularity optimization and maximum likelihood methods for community detection. *Phys. Rev. E* **94**, 052315, DOI: 10.1103/PhysRevE.94.052315 (2016).
- [6] Young, J.-G., St-Onge, G., Desrosiers, P. & Dubé, L. J. Universality of the stochastic block model. *Phys. Rev. E* **98**, 032309, DOI: 10.1103/PhysRevE.98.032309 (2018).
- [7] Lancichinetti, A., Fortunato, S. & Radicchi, F. Benchmark graphs for testing community detection algorithms. *Physical Review E* **78**, 046110, DOI: 10.1103/PhysRevE.78.046110 (2008).
- [8] Amaral, L. A. N., Scala, A., Barthelemy, M. & Stanley, H. E. Classes of small-world networks. *Proceedings of the National Academy of Sciences of the United States of America* **97**, 11149–11152, DOI: 10.1073/pnas.200327197 (2000).
- [9] Hagberg, A. A., Schult, D. A. & Swart, P. J. Exploring network structure, dynamics, and function using networkx. In Varoquaux, G., Vaught, T. & Millman, J. (eds.) *Proceedings of the 7th Python in Science Conference*, 11 – 15 (Pasadena, CA USA, 2008).
- [10] Colizza, V., Flammini, A., Serrano, M. Á. & Vespignani, A. Detecting rich-club ordering in complex networks. *Nature Physics* **2**, 110–115, DOI: 10.1038/nphys209 (2006).
